# Supplementary material for: Synthesis of urchin-like Fe3O4@SiO2@ZnO/CdS core–shell microspheres for the repeated photocatalytic degradation of rhodamine B under visible light
Source: Royal Society of Chemistry journal article supplement (doi:10.1039/c5cy02090e), 2016-01-01
Supplement: c5cy02090e1.pdf [file c5cy02090e1.pdf]

**Supplementary material**

**Synthesis of urchin-like  $\text{Fe}_3\text{O}_4@\text{SiO}_2@\text{ZnO}/\text{CdS}$  core shell microspheres for the repeated  
photocatalytic degradation of rhodamine B under visible light**

Jinghai Yang <sup>a,\*</sup>, Jian Wang <sup>a,b,c</sup>, Xiuyan Li <sup>a,\*</sup>, Dandan Wang <sup>a,b,c</sup>, Hang Song <sup>b,c</sup>

<sup>a</sup> Key Laboratory of Functional Materials Physics and Chemistry of the Ministry of Education, Jilin  
Normal University, Siping 136000, PR. China

<sup>b</sup> Changchun Institute of Optics, Fine Mechanics and Physics, Chinese Academy of Sciences,  
Changchun 130033, PR. China

<sup>c</sup> University of Chinese Academy of Sciences, Beijing 100049, PR. China

\* Corresponding author: Tel.: +86 434 3294566; Fax: +86 434 3294566.

E-mail address: [jhyang1@jlnu.edu.cn](mailto:jhyang1@jlnu.edu.cn); [lixiuyan@jlnu.edu.cn](mailto:lixiuyan@jlnu.edu.cn)

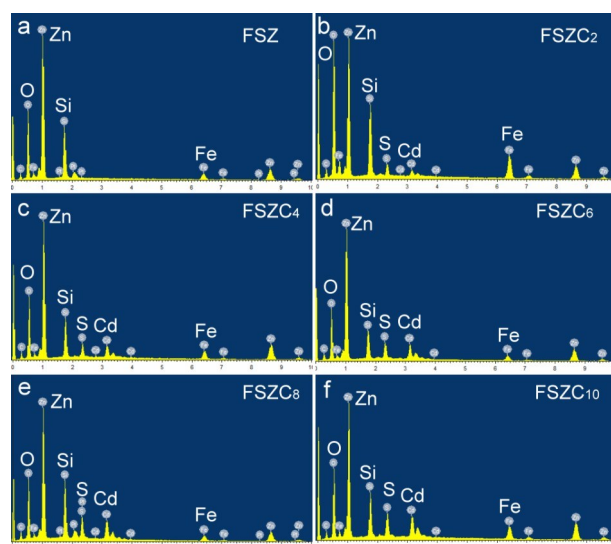

**Fig.S1** EDS patterns of  $\text{Fe}_3\text{O}_4@\text{SiO}_2@\text{ZnO}/\text{CdS}$  microspheres with different CdS deposition cycles. (a) 0 cycles; (b) 2 cycles; (c) 4 cycles; (d) 6 cycles; (e) 8 cycles; (f) 10 cycles.

| Name               | CdS<br>SILARC<br>ycles | CdS amount<br>(wt.%) | BET surface areas<br>(m <sup>2</sup> .g <sup>-1</sup> ) |
|--------------------|------------------------|----------------------|---------------------------------------------------------|
| FSZ                | 0                      | 0                    | 15.57                                                   |
| FSZC <sub>2</sub>  | 2                      | 2.6                  | 18.73                                                   |
| FSZC <sub>4</sub>  | 4                      | 4.2                  | 20.07                                                   |
| FSZC <sub>6</sub>  | 6                      | 8.3                  | 21.75                                                   |
| FSZC <sub>8</sub>  | 8                      | 10.1                 | 23.24                                                   |
| FSZC <sub>10</sub> | 10                     | 13.9                 | 22.08                                                   |

**Table S1** Summarized CdS amount and BET surface areas of FSZC<sub>x</sub> samples.

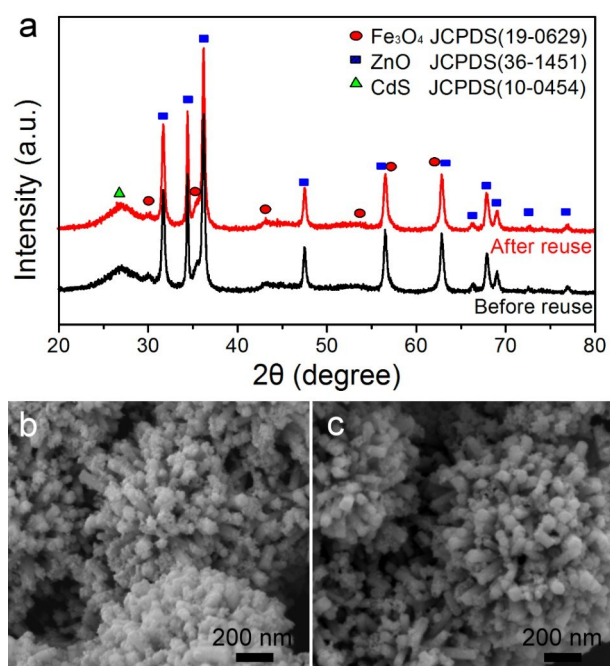

**Fig.S2** XRD patterns and SEM images of FSZC<sub>x</sub> before and after RhB discoloration.
